# Supplementary material
Source: publisher figshare collection journal article supplement (https://acs.figshare.com/ndownloader/files/4184095)
Supplement: Supplementary file 1 [file 4184095]

## Supporting information:

# Assembly, Two-Photon Absorption and Bioimaging Applications of A Cuprous Cluster

Xuchun Wang,<sup>†</sup> Xiaohe Tian,<sup>‡</sup> Qiong Zhang,<sup>†</sup> Pingping Sun,<sup>†</sup> Jieying Wu,<sup>†</sup> Hongping Zhou,<sup>†</sup> Baokang Jin,<sup>†</sup> Jiayang Yang,<sup>†</sup> Shengyi Zhang,<sup>†</sup> Chuankui Wang,<sup>-</sup> Xutang Tao,<sup>§</sup> Minhua Jiang,<sup>§</sup> Yupeng Tian<sup>\*,†,§,⊥</sup>

Department of Chemistry, Anhui Province Key Laboratory of Functional Inorganic Materials, Anhui University, Hefei, 230039, P. R. China. Fax: +86-551-5107304; Tel: +86-551-5108151; E-mail: [yptian@ahu.edu.cn](mailto:yptian@ahu.edu.cn), [yptianahu@163.com](mailto:yptianahu@163.com); Department of Biomedical Science and Department of Chemistry, University of Sheffield, Sheffield, UK; State Key Laboratory of Crystal Materials, Shandong University, Jinan, 250100, P. R. China; Department of Physics, Shandong Normal University, Jinan 250014, P. R. China; State Key Laboratory of Coordination Chemistry, Nanjing University, Nanjing, 230039, P. R. China.

Page

|                                                                                                                                                                                                                 |    |
|-----------------------------------------------------------------------------------------------------------------------------------------------------------------------------------------------------------------|----|
| 1. Synthesis of (E)-(4-diethylanilinostryl)pyridine (L).....                                                                                                                                                    | S2 |
| 2. Single-photon fluorescence quantum yield (Φ).....                                                                                                                                                            | S2 |
| 3. Photophysical Determinations of the Interactions with Calf-thymus DNA Between Cu <sub>4</sub> I <sub>4</sub> L <sub>4</sub> and the Ligand.....                                                              | S3 |
| Table S1. Selected bond lengths (Å) and angles (°) for the ligand and cluster Cu <sub>4</sub> I <sub>4</sub> L <sub>4</sub> .....                                                                               | S3 |
| Table S2. Crystallographic data and structure refinement summary for the ligand and Cu <sub>4</sub> I <sub>4</sub> L <sub>4</sub> .....                                                                         | S4 |
| Table S3. Cytotoxicity Data (MCF-7 cell, 2 h).....                                                                                                                                                              | S4 |
| Figure S1. Crystal structure of L .....                                                                                                                                                                         | S5 |
| Figure S2. DFT computed frontier orbitals of L and Cu <sub>4</sub> I <sub>4</sub> L <sub>4</sub> obtained at the B3LYP level.....                                                                               | S5 |
| Figure S3. Fluorescence lifetimes of Cu <sub>4</sub> I <sub>4</sub> L <sub>4</sub> and the ligand in four solvents .....                                                                                        | S6 |
| Figure S4. Log-Log linear of squared dependence of induced fluorescence signal .....                                                                                                                            | S6 |
| Figure S5. Absorption spectra of the compound L (left) and compound Cu <sub>4</sub> I <sub>4</sub> L <sub>4</sub> (right) in Tris-HCl buffer (NaCl, pH = 7.2) upon addition of calf-thymus DNA .....            | S7 |
| Figure S6. Emission spectra of EB bound to DNA in the absence and presence of the compounds L (left) and Cu <sub>4</sub> I <sub>4</sub> L <sub>4</sub> (right) in Tris-HCl buffer (NaCl, pH = 7.2).....         | S7 |
| Figure S7. Induced CD spectra upon addition of ct-DNA to L and ML (1 × 10 <sup>-3</sup> mM) in fixed ratios (r = [DNA]/[L] or [ML] ), r = 1). .....                                                             | S8 |
| Figure S8. Control experiment for Cu <sub>4</sub> I <sub>4</sub> L <sub>4</sub> and L (DAPI) image indicted there is no affection between the Cu <sub>4</sub> I <sub>4</sub> L <sub>4</sub> a nd DAPI (L) ..... | S8 |
| Figure S9. Luminescence intensity of Cu <sub>4</sub> I <sub>4</sub> L <sub>4</sub> (200 μM) in MCF-7 nucleus region under laser exposure lasted over 15 minutes, which reveals almost no photon bleaching. .... | S9 |
| Figure S10. MALDI-TOF Mass spectrometry of Cu <sub>4</sub> I <sub>4</sub> L <sub>4</sub> .....                                                                                                                  | S9 |

## 1. Synthesis of (E)-(4-diethylanilinostyryl)pyridine (L):

A mixture of 11.30 mL (0.12 mol) of tert-butanol, 0.78 g (0.02 mol) of potassium was introduced into a 50 mL one-necked flask fitted with a condenser. After the reaction, a total of 0.98 mL (10 mmol) 4-picoline, 1.77 g (10 mmol) of 4-diethylaminobenzaldehyde were added. The mixture was heated for 2 hours at 80 °C under stirring; tert-butanol was evaporated, and then added to 200 mL dichloromethane, washed once with 200 mL ice water, and stirred. The aqueous phase was extracted three times with dichloromethane. The organic phase was dried on sodium sulfate, the solvent was evaporated, and the crude solid was recrystallized in toluene. Yield: 86.10%. <sup>1</sup>H NMR (500 MHz, DMSO-*d*<sub>6</sub>, δ): 8.43 (d, *J* = 5.25 Hz, 2H, py H), 7.42 (t, *J* = 8.85 Hz, 2H, py H), 7.23 (d, *J* = 5.37 Hz, 2H, CH=CH), 7.03 (d, *J* = 16.07 Hz, 1H, Ar H), 6.70 (d, *J* = 16.07 Hz, 1H, Ar H), 6.27-6.66 (m, 2H, Ar H), 3.39 (q, 4H, CH<sub>2</sub>), 1.13 (t, 6H, CH<sub>3</sub>). <sup>13</sup>C NMR (500 MHz, CDCl<sub>3</sub>, ppm): δ 148.56-146.96 (m, py), 134.57 (s, py), 128.86 (s, benzene), 120.51-119.95 (d, benzene), 111.56 (s, CH=CH), 44.47 (s, CH<sub>2</sub>), 12.62 (s, CH<sub>3</sub>). Anal. Calcd. for C<sub>17</sub>H<sub>20</sub>N<sub>2</sub> (EI-MS: 253.3): C, 80.91; H, 7.99; N, 11.10. Found: C, 80.76; H, 7.91; N, 11.01; IR data (KBr, cm<sup>-1</sup>): 3026 w, 1581 s. Single crystals of the ligand suitable for X-ray analysis were obtained by slow evaporation of dichloromethane/benzene mixture solution at room temperature for five days.

## 2. Single-photon fluorescence quantum yield (Φ)

Quantum yield (Φ) of Cu<sub>4</sub>I<sub>4</sub>L<sub>4</sub> and L in various solvents were determined with reference method. Rh6G (Φ = 0.90 in ethanol) was used as the reference standard while RhB was used to calibrate the system. In order to avoid possible aggregation and self-absorption, the concentrations of all solutions are 1.0 × 10<sup>-5</sup> mol/L. The quantum yield was calculated according to the equation <sup>S-(1)</sup>

$$\Phi_s = \Phi_r \left( \frac{A_r(\lambda_r)}{A_s(\lambda_s)} \right) \left( \frac{I(\lambda_r)}{I(\lambda_s)} \right) \left( \frac{n_s^2}{n_r^2} \right) \frac{\int F_s}{\int F_r}$$

where, Φ is the quantum yield, *n* is the refractive index, *I*(λ) is the relative intensity of the exciting light at wavelength λ, *A*(λ) is the absorbance of the solution at the exciting wavelength λ, and ∫<sup>F</sup> represents the integrated area under the corrected emission spectrum. Subscripts *s* and *r* refer to the sample and reference solutions, respectively. Quantificational measurements as illustrated in Table S5 that the quantum yields (Φ) of Cu<sub>4</sub>I<sub>4</sub>L<sub>4</sub> is enhanced compared with that of L.

### 3. Photophysical Determinations of the Interactions with Calf-thymus DNA Between Cu<sub>4</sub>I<sub>4</sub>L<sub>4</sub> and the Ligand.

To gain further insights into Cu<sub>4</sub>I<sub>4</sub>L<sub>4</sub> stained the cell nucleus, photophysical determinations of the interactions of ct-DNA between the ligand and complex were carried out to investigate the DNA binding ability. The absorption spectra of these experimental samples were insensitive to compounds (L and Cu<sub>4</sub>I<sub>4</sub>L<sub>4</sub>) concentrations in Tris–HCl buffer upon addition of calf-thymus DNA. However, the emission spectra of EB bound to DNA in the presence of the compounds Cu<sub>4</sub>I<sub>4</sub>L<sub>4</sub> in Tris–HCl buffer exhibit clearer enhancement than that of ligand L in Tris–HCl buffer near 600 nm. Moreover, Cu<sub>4</sub>I<sub>4</sub>L<sub>4</sub> could induce more evident disturbances on DNA base stacking than ligand (Figure S8), reflecting the impact of the moiety on DNA binding modes.

**Table S1** Selected bond lengths (Å) and angles (°) for **the ligand** and cluster **Cu<sub>4</sub>I<sub>4</sub>L<sub>4</sub>**.

| <b>L</b>                                        |           |                           |           |
|-------------------------------------------------|-----------|---------------------------|-----------|
| N(1)-C(1)                                       | 1.324(7)  | N(1)-C(5)                 | 1.338(7)  |
| N(2)-C(11)                                      | 1.371(6)  | N(2)-C(14)                | 1.459(7)  |
| N(2)-C(16)                                      | 1.462(7)  | C(3)-C(6)                 | 1.465(6)  |
| C(6)-C(7)                                       | 1.325(6)  | C(7)-C(8)                 | 1.455(7)  |
| C(1)-N(1)-C(5)                                  | 115.2(5)  | C(11)-N(2)-C(14)          | 121.8(5)  |
| C(11)-N(2)-C(16)                                | 122.7(5)  | C(14)-N(2)-C(16)          | 115.0(4)  |
| C(2)-C(3)-C(6)                                  | 120.2(5)  | C(7)-C(6)-C(3)            | 126.8(5)  |
| C(6)-C(7)-C(8)                                  | 128.0(5)  | C(9)-C(8)-C(7)            | 124.0(5)  |
| <b>Cu<sub>4</sub>I<sub>4</sub>L<sub>4</sub></b> |           |                           |           |
| Cu(1)-N(1)                                      | 2.058(10) | Cu(2)-N(3)                | 2.032(11) |
| Cu(1)-I(1)                                      | 2.627(2)  | N(1)-C(1)                 | 1.243(17) |
| Cu(1)-I(2)                                      | 2.683(2)  | N(1)-C(5)                 | 1.30(2)   |
| Cu(2)-I(2)                                      | 2.616(2)  | N(3)-C(18)                | 1.31(2)   |
| Cu(2)-I(1)                                      | 2.612(2)  | N(3)-C(22)                | 1.308(16) |
| Cu(1)-Cu(2)                                     | 2.640(2)  | Cu(1)-Cu(1) <sup>#1</sup> | 2.659(3)  |
| Cu(2)-Cu(2) <sup>#1</sup>                       | 2.721(4)  | Cu(2)-Cu(1) <sup>#1</sup> | 2.732(3)  |
| N(1)-Cu(1)-I(1)                                 | 111.9(3)  | C(1)-N(1)-C(5)            | 118.7(13) |
| N(1)-Cu(1)-I(2)                                 | 108.5(4)  | C(1)-N(1)-Cu(1)           | 119.1(11) |
| I(1)-Cu(1)-I(2)                                 | 107.97(7) | C(5)-N(1)-Cu(1)           | 122.1(10) |
| Cu(2)-I(1)-Cu(1)                                | 60.53(5)  | N(1)-C(1)-C(2)            | 120.0(15) |
| Cu(2)-I(2)-Cu(1)                                | 59.76(5)  | C(2)-C(3)-C(4)            | 113.9(14) |

Symmetry transformations used to generate equivalent atoms: #1  $x+1/2, -y+3/2, z$ ; #2  $x-1/2, -$

$y+3/2, z$ .

**Table S2** Crystallographic data and structure refinement summary for the ligand and **Cu<sub>4</sub>I<sub>4</sub>L<sub>4</sub>**.

| compound                                      | <b>L</b>                                       | <b>Cu<sub>4</sub>I<sub>4</sub>L<sub>4</sub></b>                               |
|-----------------------------------------------|------------------------------------------------|-------------------------------------------------------------------------------|
| formula                                       | C <sub>17</sub> H <sub>20</sub> N <sub>2</sub> | C <sub>34</sub> H <sub>40</sub> Cu <sub>2</sub> I <sub>2</sub> N <sub>4</sub> |
| formula weight                                | 252.35                                         | 885.58                                                                        |
| <i>T</i> /K                                   | 298                                            | 298                                                                           |
| Crystal system                                | Orthorhombic                                   | Monoclinic                                                                    |
| space group                                   | <i>Pna</i> 2 <sub>1</sub>                      | <i>C</i> <sub>2/c</sub>                                                       |
| <i>a</i> [Å]                                  | 12.717(8)                                      | 31.674(1)                                                                     |
| <i>b</i> [Å]                                  | 15.016(9)                                      | 10.142(5)                                                                     |
| <i>c</i> [Å]                                  | 7.578(5)                                       | 24.001(7)                                                                     |
| $\beta$ [°]                                   | 90                                             | 115.291(6)                                                                    |
| <i>V</i> [Å <sup>3</sup> ]                    | 1447.1(2)                                      | 6972(5)                                                                       |
| <i>Z</i>                                      | 4                                              | 8                                                                             |
| <i>D</i> <sub>calc</sub> (gcm <sup>-3</sup> ) | 1.158                                          | 1.687                                                                         |
| $\theta$ range [°]                            | 2.10-25.01                                     | 1.81-25.02                                                                    |
| Total no. of data                             | 7135                                           | 15359                                                                         |
| No. of unique data                            | 1379                                           | 5490                                                                          |
| No. of para refined                           | 174                                            | 379                                                                           |
| <i>R</i> <sub>1</sub>                         | 0.0462                                         | 0.0795                                                                        |
| <i>wR</i> <sub>2</sub>                        | 0.1009                                         | 0.2434                                                                        |
| GOF                                           | 1.082                                          | 1.012                                                                         |

$$R_1 = \frac{\sum \|F_o - F_c\|}{\sum F_o}; \quad wR_2^b = \left[ \frac{\sum (w(F_o^2 - F_c^2)^2)}{\sum (w(F_o^2)^2)} \right]^{1/2/K}$$

**Table S3.** Cytotoxicity Data (MCF-7 cell, 2 h)<sup>[a]</sup>

| Concentration                                                     | control | 100 μM | 200 μM | 300 μM | 400 μM |
|-------------------------------------------------------------------|---------|--------|--------|--------|--------|
| % Cell survival ( Cu <sub>4</sub> I <sub>4</sub> L <sub>4</sub> ) | 100 ±2  | 94 ±3  | 83 ±1  | 75 ±5  | 64 ±2  |
| % Cell survival ( L)                                              | 100 ±2  | 55 ±7  | 39 ±4  | 26 ±3  | 11 ±5  |

<sup>[a]</sup> Cell viability was quantified by the MTT assay (mean ( SD)).

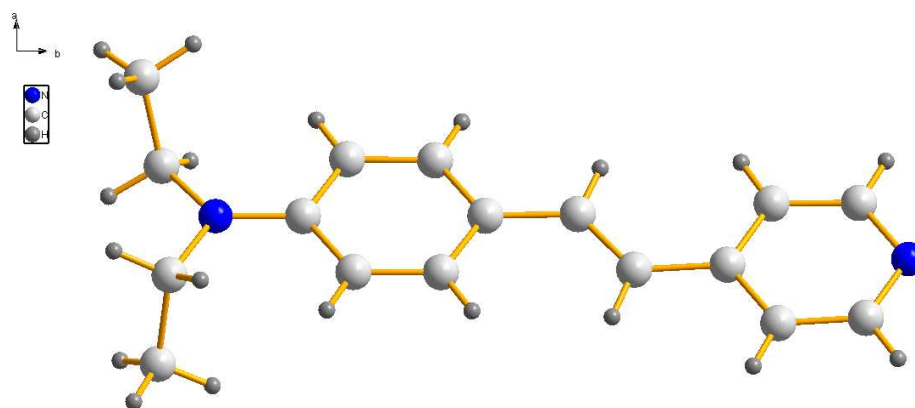

**Figure S1.** Crystal structure of L

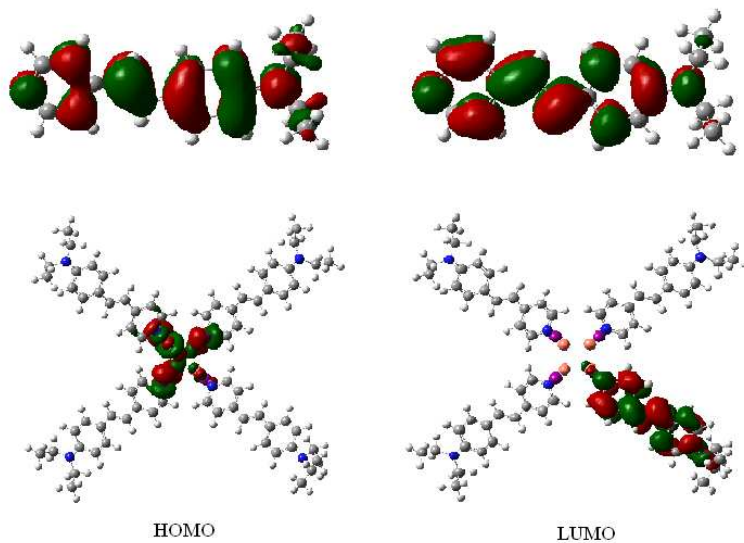

**Figure S2.** DFT computed frontier orbitals of L and  $\text{Cu}_4\text{I}_4\text{L}_4$  obtained at the B3LYP level.

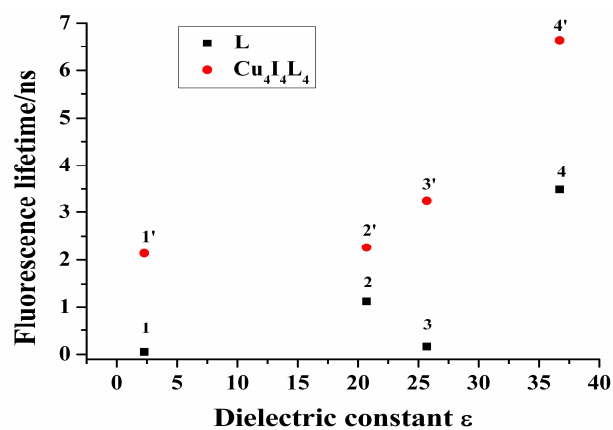

**Figure S3.** Fluorescence lifetimes of the ligand and Cu<sub>4</sub>I<sub>4</sub>L<sub>4</sub> ( $1.0 \times 10^{-5}$  mol L<sup>-1</sup>) in four solvents: benzene (1, 1'); Acetone (2, 2'); Ethanol (3, 3'); DMF (4, 4').

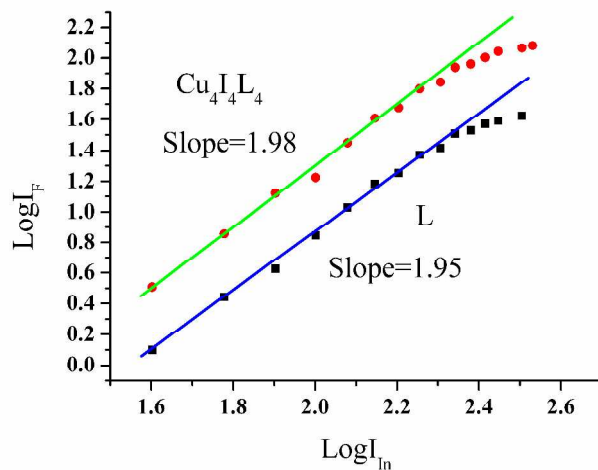

**Figure S4.** Log-Log linear of squared dependence of induced fluorescence signal of Cu<sub>4</sub>I<sub>4</sub>L<sub>4</sub> and L in DMF solvent ( $1.0 \times 10^{-4}$  mol L<sup>-1</sup>) and incident irradiance intensity.

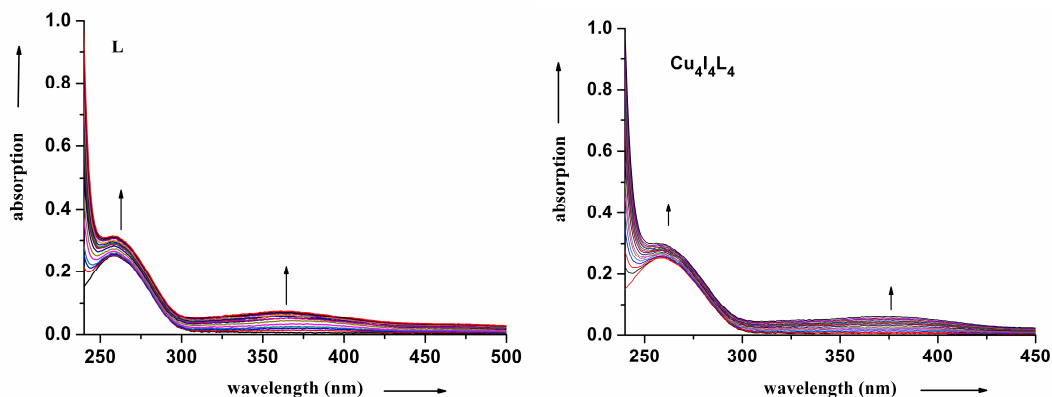

**Figure S5.** Absorption spectra of the compound **L** (left) and compound **Cu<sub>4</sub>I<sub>4</sub>L<sub>4</sub>** (right) in Tris-HCl buffer (NaCl, pH = 7.2) in the presence of calf-thymus DNA. [DNA] =  $2.0 \times 10^{-5}$  mol L<sup>-1</sup>, [compound] =  $1.0 \times 10^{-5}$  mol L<sup>-1</sup>.

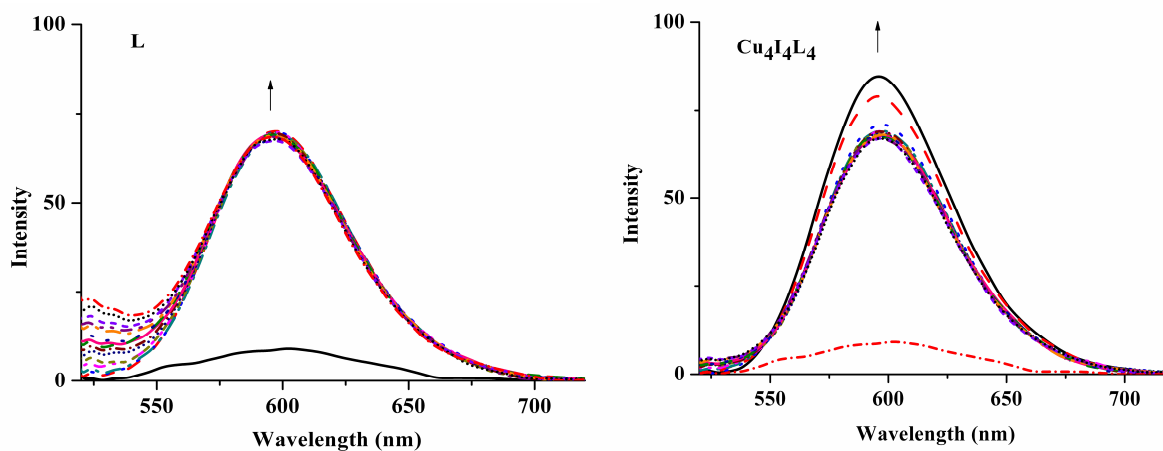

**Figure S6.** Emission spectra of EB bound to DNA in the absence and presence of the compounds **L** (left) and **Cu<sub>4</sub>I<sub>4</sub>L<sub>4</sub>** (right) in Tris-HCl buffer (NaCl, pH = 7.2). [EB] =  $1 \times 10^{-6}$  M; [DNA] =  $2 \times 10^{-5}$  mol L<sup>-1</sup>; [compound] =  $1 \times 10^{-5}$  mol L<sup>-1</sup>.

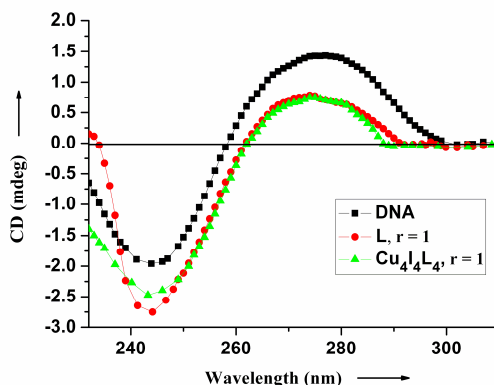

**Figure S7.** Induced CD spectra upon addition of ct-DNA to L and  $\text{Cu}_4\text{I}_4\text{L}_4$  ( $1.0 \times 10^{-5} \text{ mol L}^{-1}$ ) in fixed ratios ( $r = [\text{DNA}]/[\text{L}]$  or  $[\text{Cu}_4\text{I}_4\text{L}_4]$ ),  $r = 1$ ).

Circular dichroism spectra of the complexes, in 20 mM Hepes buffer pH 7 containing 30 mM NaCl, were measured using a JASCO J-820 CD spectrophotometer. Each sample solution (3000  $\mu\text{L}$ , 3 mL) was obtained by adding the required volume of stock solution of calf thymus DNA and metal complex dissolved in the above Hepes buffer, and finally topping up the solution with an additional volume of the same buffer. Two sets of complex–DNA solutions were used: the ratio of the complex : DNA = 40  $\mu\text{M}$  : 40  $\mu\text{M}$  (1 : 1) in each solution.

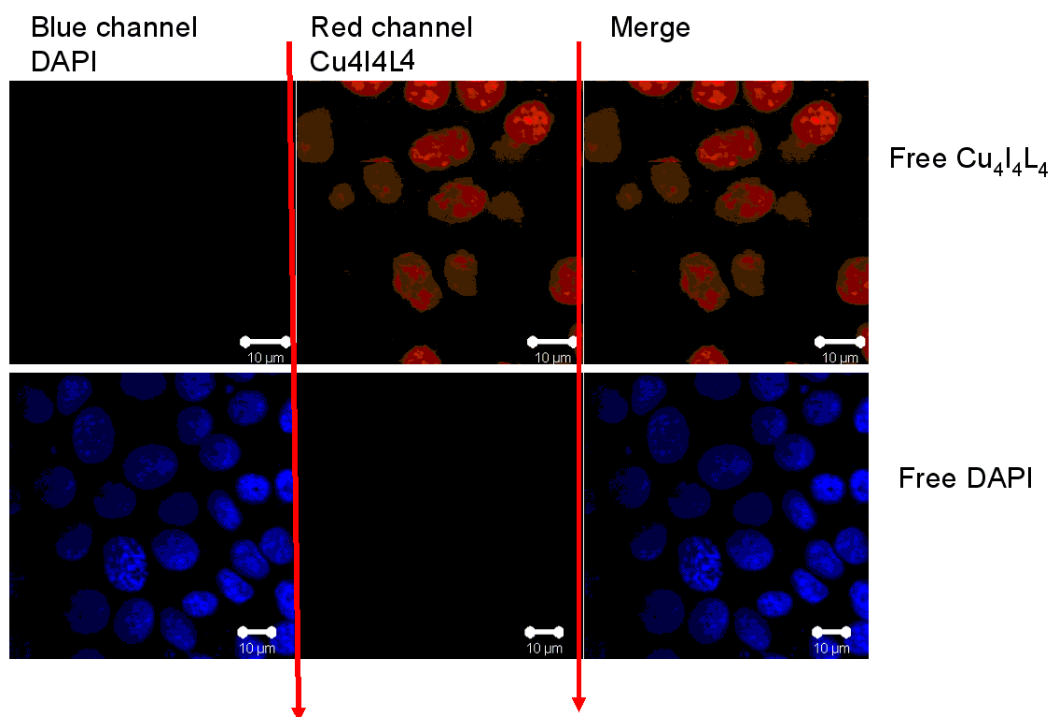

**Figure S8.** Control experiment for  $\text{Cu}_4\text{I}_4\text{L}_4$  and DAPI image indicated there is no affection between the  $\text{Cu}_4\text{I}_4\text{L}_4$  and DAPI.



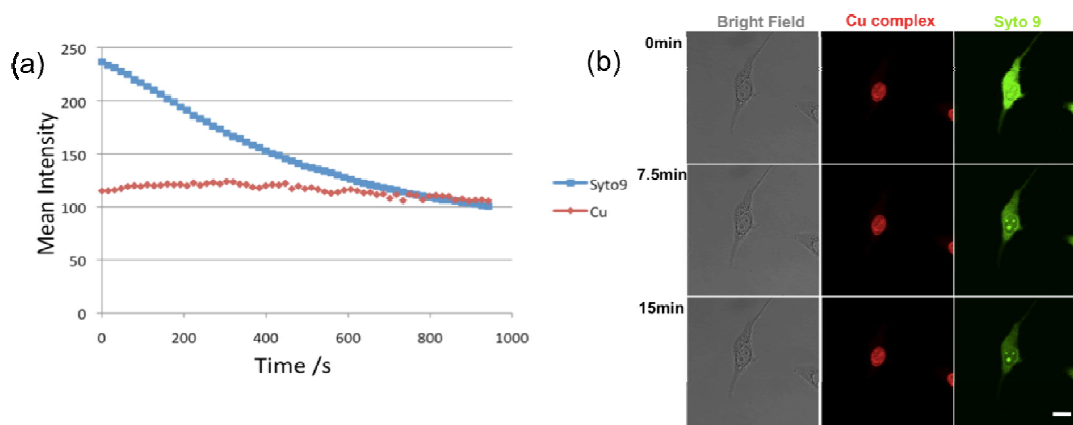

**Figure S9.** (a) Time series showing luminescence intensity of  $\text{Cu}_4\text{L}_4$  in a MCF-7 nucleus region (200 $\mu\text{M}$ , 2hours) under laser exposure over 15mins, compare with Syto 9, there is no obvious photon bleaching observed, data point obtain every 20 seconds. (b) Images from time point 0, 7.5 and 15 minutes, scale bars represent 10  $\mu\text{M}$ .

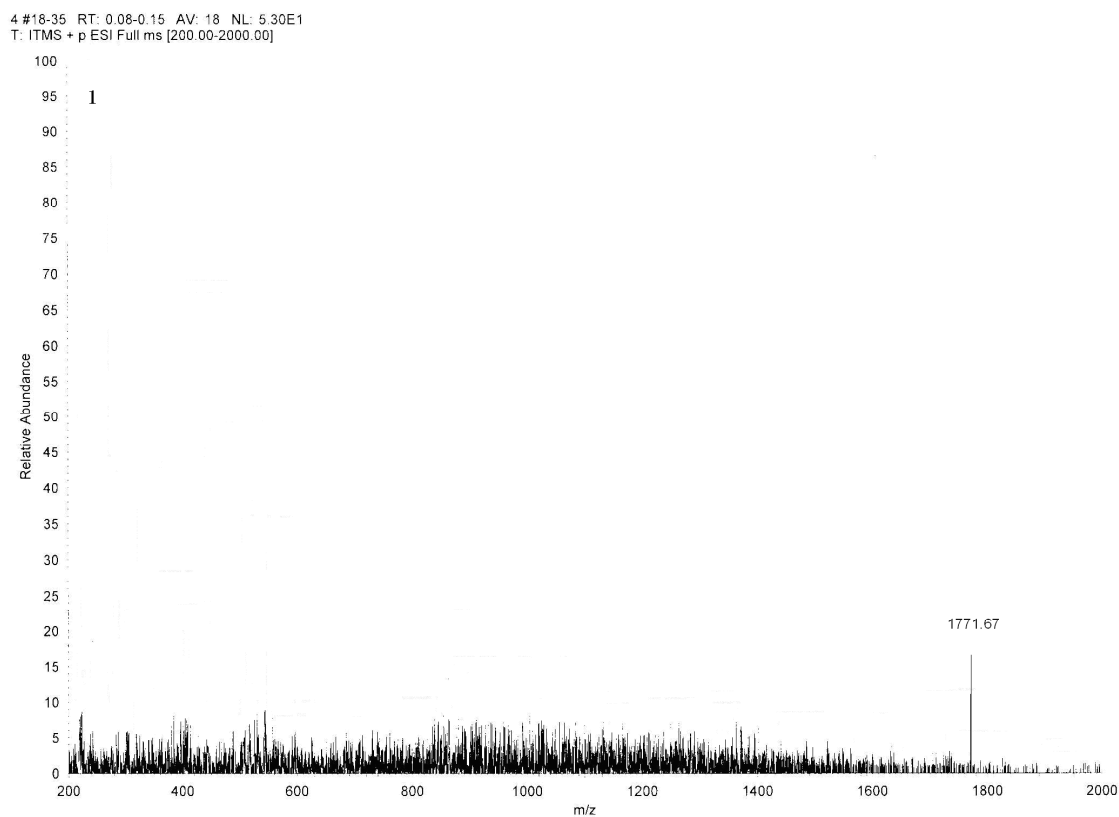

**Figure S10.** MALDI-TOF Mass spectrometry of  $\text{Cu}_4\text{L}_4$ .

s-(1) Woo H. Y.; Liu B.; Kohler B.; Korystov D.; Mikhailovsky A.; Bazan G. C. *J. Am. Chem. Soc.* **2005**, *127*, 14721-14729.
